# Supplementary material for: Diagnostic and prognostic value of serum C-reactive protein in heart failure with preserved ejection fraction: a systematic review and meta-analysis
Source: Springer Nature journal article supplement (doi:10.1007/s10741-020-09927-x), 2020-02-06
Supplement: 10741_2020_9927_MOESM1_ESM.pdf [file 10741_2020_9927_MOESM1_ESM.pdf]

**Supplementary Table 1: NOS risk of bias scale for included cohort studies**

| Studies             | Selection                                |                                     |                           | Outcome of interest not present at start of study | Comparability | Outcome               |                                |                                       | Total score (0-9) |
|---------------------|------------------------------------------|-------------------------------------|---------------------------|---------------------------------------------------|---------------|-----------------------|--------------------------------|---------------------------------------|-------------------|
|                     | Representativeness of the exposed cohort | Selection of the non-exposed cohort | Ascertainment of exposure |                                                   |               | Assessment of outcome | Adequacy of duration follow-up | Adequacy of completeness of follow-up |                   |
| Albadri 2017        | 1                                        | 0                                   | 1                         | 1                                                 | 0             | 1                     | 1                              | 1                                     | 6                 |
| Aramburu-Bodas 2015 | 1                                        | 1                                   | 1                         | 1                                                 | 1 (LVEF)      | 1                     | 1                              | 1                                     | 8                 |
| Brouwers 2014       | 1                                        | 1                                   | 1                         | 1                                                 | 0             | 1                     | 1                              | 1                                     | 7                 |
| Chen 2013           | 1                                        | 1                                   | 1                         | 1                                                 | 1 (LVEF)      | 1                     | 1                              | 1                                     | 8                 |
| De Boer 2018        | 1                                        | 1                                   | 1                         | 1                                                 | 0             | 1                     | 1                              | 1                                     | 7                 |
| Hirata 2017         | 1                                        | 1                                   | 1                         | 1                                                 | 1 (age)       | 1                     | 1                              | 1                                     | 8                 |
| Imai 2017           | 1                                        | 1                                   | 1                         | 1                                                 | 1 (LVEF)      | 1                     | 1                              | 1                                     | 8                 |
| Kalogeropoulos 2009 | 1                                        | 1                                   | 1                         | 1                                                 | 0             | 1                     | 1                              | 1                                     | 7                 |
| Koller 2014         | 1                                        | 1                                   | 1                         | 1                                                 | 2 (age, LVEF) | 1                     | 1                              | 1                                     | 9                 |
| Lourenco 2019       | 1                                        | 1                                   | 1                         | 1                                                 | 0             | 1                     | 1                              | 1                                     | 7                 |
| Matsubara 2014      | 1                                        | 1                                   | 1                         | 1                                                 | 1 (LVEF)      | 1                     | 1                              | 1                                     | 8                 |
| Matsushita 2019     | 1                                        | 1                                   | 1                         | 1                                                 | 2 (age, LVEF) | 1                     | 1                              | 1                                     | 9                 |
| Otsuka 2018         | 1                                        | 1                                   | 1                         | 1                                                 | 1 (LVEF)      | 1                     | 1                              | 1                                     | 8                 |
| Sabatine 2007       | 1                                        | 1                                   | 1                         | 1                                                 | 2 (age, LVEF) | 1                     | 1                              | 1                                     | 9                 |
| Sanders 2015        | 1                                        | 1                                   | 1                         | 1                                                 | 0             | 1                     | 1                              | 1                                     | 7                 |
| Silverman 2016      | 1                                        | 1                                   | 1                         | 1                                                 | 0             | 1                     | 1                              | 1                                     | 7                 |
| Sugano 2018         | 1                                        | 1                                   | 1                         | 1                                                 | 2 (age, LVEF) | 1                     | 1                              | 1                                     | 9                 |
| Tromp 2017          | 1                                        | 1                                   | 1                         | 0                                                 | 1 (LVEF)      | 1                     | 1                              | 1                                     | 7                 |
| Vrsalović 2015      | 1                                        | 0                                   | 1                         | 1                                                 | 0             | 1                     | 1                              | 1                                     | 6                 |

LVEF = left ventricular ejection fraction
